# Supplementary material for: Spatial Changes in Glomalin-Related Soil Protein and Their Correlation with Soil Properties in the Black Soil Region of Northeast China
Source: MDPI journal article supplement (doi:10.3390/agronomy12092165), 2022-09-12
Supplement: s1 [file s1]

**Table S1** Sampling sites location information and edaphic factors. The value of edaphic factor was mean  $\pm$  standard deviation (n=4).

| Sample | Location     | Longitude | Latitude | Altitude(m) | EE-GRSP<br>(mg/g) | DE-GRSP<br>(mg/g) | T-GRSP<br>(mg/g) | pH              | SOM%            | Total<br>N(g/kg) | Total<br>P(g/kg) | Urease(mg/g)     | ACP(mg/g)         |
|--------|--------------|-----------|----------|-------------|-------------------|-------------------|------------------|-----------------|-----------------|------------------|------------------|------------------|-------------------|
| NJ1    | Nenjiang1    | 125.38°E  | 49.18°N  | 321.99      | 0.49 $\pm$ 0.03   | 0.42 $\pm$ 0.02   | 0.91 $\pm$ 0.04  | 6.38 $\pm$ 0.03 | 3.89 $\pm$ 0.19 | 1.85 $\pm$ 0.12  | 0.65 $\pm$ 0.03  | 16.31 $\pm$ 4.21 | 76.61 $\pm$ 13.44 |
| NJ2    | Nenjiang2    | 125.88°E  | 49.02°N  | 320.68      | 0.50 $\pm$ 0.02   | 0.43 $\pm$ 0.03   | 0.93 $\pm$ 0.04  | 6.06 $\pm$ 0.10 | 5.79 $\pm$ 0.15 | 3.06 $\pm$ 0.08  | 1.13 $\pm$ 0.04  | 11.32 $\pm$ 1.38 | 94.98 $\pm$ 8.27  |
| WD1    | Wudalianchi1 | 126.13°E  | 48.66°N  | 304.09      | 0.44 $\pm$ 0.02   | 0.54 $\pm$ 0.02   | 0.98 $\pm$ 0.02  | 6.35 $\pm$ 0.12 | 4.12 $\pm$ 0.13 | 1.94 $\pm$ 0.05  | 1.01 $\pm$ 0.06  | 12.55 $\pm$ 3.17 | 58.28 $\pm$ 5.39  |
| NH2    | Nehe2        | 124.90°E  | 48.51°N  | 233.07      | 0.45 $\pm$ 0.04   | 0.39 $\pm$ 0.02   | 0.84 $\pm$ 0.03  | 6.30 $\pm$ 0.08 | 3.85 $\pm$ 0.39 | 1.77 $\pm$ 0.08  | 0.67 $\pm$ 0.04  | 16.69 $\pm$ 0.81 | 81.31 $\pm$ 18.57 |
| BA2    | Beian2       | 126.50°E  | 48.29°N  | 312.81      | 0.49 $\pm$ 0.01   | 0.53 $\pm$ 0.03   | 1.02 $\pm$ 0.04  | 6.11 $\pm$ 0.10 | 5.43 $\pm$ 0.44 | 2.24 $\pm$ 0.14  | 0.88 $\pm$ 0.05  | 14.91 $\pm$ 1.94 | 77.28 $\pm$ 8.34  |
| NH1    | Nehe1        | 124.99°E  | 48.17°N  | 255.45      | 0.35 $\pm$ 0.04   | 0.36 $\pm$ 0.01   | 0.71 $\pm$ 0.04  | 6.41 $\pm$ 0.08 | 4.46 $\pm$ 0.26 | 2.19 $\pm$ 0.15  | 0.62 $\pm$ 0.05  | 22.23 $\pm$ 9.88 | 95.09 $\pm$ 12.94 |
| KD1    | Kedong1      | 126.25°E  | 47.98°N  | 311.60      | 0.50 $\pm$ 0.02   | 0.63 $\pm$ 0.02   | 1.13 $\pm$ 0.02  | 6.61 $\pm$ 0.12 | 4.59 $\pm$ 0.31 | 2.18 $\pm$ 0.13  | 0.67 $\pm$ 0.01  | 20.75 $\pm$ 7.01 | 85.51 $\pm$ 6.02  |
| KS2    | Keshan2      | 125.91°E  | 47.97°N  | 245.55      | 0.39 $\pm$ 0.04   | 0.38 $\pm$ 0.02   | 0.77 $\pm$ 0.03  | 6.88 $\pm$ 0.24 | 3.29 $\pm$ 0.18 | 1.62 $\pm$ 0.08  | 0.53 $\pm$ 0.03  | 15.02 $\pm$ 1.89 | 62.44 $\pm$ 6.84  |
| YA2    | Yian2        | 125.27°E  | 47.92°N  | 240.83      | 0.42 $\pm$ 0.04   | 0.39 $\pm$ 0.01   | 0.81 $\pm$ 0.04  | 6.68 $\pm$ 0.19 | 3.64 $\pm$ 0.26 | 1.91 $\pm$ 0.18  | 0.66 $\pm$ 0.07  | 14.64 $\pm$ 1.72 | 88.42 $\pm$ 8.92  |
| HL2    | Hailun2      | 126.77°E  | 47.87°N  | 220.58      | 0.45 $\pm$ 0.02   | 0.53 $\pm$ 0.03   | 0.98 $\pm$ 0.04  | 6.06 $\pm$ 0.02 | 6.31 $\pm$ 0.34 | 2.60 $\pm$ 0.10  | 0.98 $\pm$ 0.03  | 21.03 $\pm$ 3.76 | 105.92 $\pm$ 5.87 |
| BQ2    | Baiquan2     | 126.05°E  | 47.53°N  | 264.88      | 0.41 $\pm$ 0.03   | 0.43 $\pm$ 0.02   | 0.84 $\pm$ 0.03  | 6.73 $\pm$ 0.29 | 3.90 $\pm$ 0.13 | 1.94 $\pm$ 0.11  | 0.67 $\pm$ 0.07  | 19.05 $\pm$ 2.06 | 63.42 $\pm$ 5.18  |
| HL1    | Hailun1      | 126.95°E  | 47.42°N  | 266.50      | 0.43 $\pm$ 0.01   | 0.51 $\pm$ 0.03   | 0.94 $\pm$ 0.02  | 6.02 $\pm$ 0.09 | 5.27 $\pm$ 0.15 | 1.80 $\pm$ 0.12  | 0.81 $\pm$ 0.07  | 14.64 $\pm$ 3.87 | 75.98 $\pm$ 3.99  |
| SL1    | Suiling1     | 127.05°E  | 47.23°N  | 185.80      | 0.49 $\pm$ 0.01   | 0.61 $\pm$ 0.02   | 1.11 $\pm$ 0.03  | 5.89 $\pm$ 0.10 | 5.85 $\pm$ 0.22 | 2.00 $\pm$ 0.04  | 0.94 $\pm$ 0.10  | 21.66 $\pm$ 1.81 | 74.81 $\pm$ 6.19  |
| MS1    | Mingshui1    | 125.90°E  | 47.19°N  | 268.30      | 0.43 $\pm$ 0.03   | 0.36 $\pm$ 0.01   | 0.80 $\pm$ 0.03  | 6.12 $\pm$ 0.11 | 4.35 $\pm$ 0.03 | 2.23 $\pm$ 0.07  | 0.85 $\pm$ 0.03  | 20.95 $\pm$ 2.44 | 70.15 $\pm$ 5.98  |
| MS2    | Mingshui2    | 126.16°E  | 47.14°N  | 232.60      | 0.52 $\pm$ 0.02   | 0.59 $\pm$ 0.01   | 1.11 $\pm$ 0.02  | 6.54 $\pm$ 0.05 | 4.15 $\pm$ 0.04 | 1.90 $\pm$ 0.06  | 0.55 $\pm$ 0.02  | 17.87 $\pm$ 3.33 | 58.54 $\pm$ 6.19  |
| QA2    | Qingan2      | 127.49°E  | 46.85°N  | 191.59      | 0.46 $\pm$ 0.03   | 0.52 $\pm$ 0.02   | 0.98 $\pm$ 0.03  | 5.90 $\pm$ 0.46 | 4.86 $\pm$ 0.21 | 1.68 $\pm$ 0.01  | 0.72 $\pm$ 0.03  | 14.97 $\pm$ 1.77 | 42.60 $\pm$ 7.37  |
| WK1    | Wangkui1     | 126.57°E  | 46.76°N  | 150.40      | 0.47 $\pm$ 0.02   | 0.46 $\pm$ 0.01   | 0.94 $\pm$ 0.03  | 6.57 $\pm$ 0.09 | 4.41 $\pm$ 0.12 | 2.15 $\pm$ 0.12  | 0.70 $\pm$ 0.11  | 17.87 $\pm$ 1.20 | 67.21 $\pm$ 8.54  |
| SH1    | Suihua1      | 127.02°E  | 46.67°N  | 188.20      | 0.44 $\pm$ 0.04   | 0.50 $\pm$ 0.02   | 0.93 $\pm$ 0.03  | 6.08 $\pm$ 0.09 | 3.90 $\pm$ 0.30 | 1.36 $\pm$ 0.11  | 0.68 $\pm$ 0.05  | 20.51 $\pm$ 3.52 | 49.31 $\pm$ 3.80  |
| LX2    | Lanxi2       | 126.41°E  | 46.25°N  | 136.70      | 0.36 $\pm$ 0.05   | 0.37 $\pm$ 0.04   | 0.73 $\pm$ 0.08  | 6.69 $\pm$ 0.10 | 2.20 $\pm$ 0.47 | 1.14 $\pm$ 0.24  | 0.56 $\pm$ 0.06  | 11.07 $\pm$ 3.43 | 49.18 $\pm$ 10.83 |
| BY1    | Bayan1       | 126.79°E  | 46.18°N  | 164.16      | 0.44 $\pm$ 0.02   | 0.48 $\pm$ 0.01   | 0.92 $\pm$ 0.03  | 5.89 $\pm$ 0.07 | 4.22 $\pm$ 0.26 | 1.68 $\pm$ 0.08  | 0.70 $\pm$ 0.03  | 25.03 $\pm$ 3.31 | 62.87 $\pm$ 5.06  |
| ZD1    | Zhaodong1    | 126.07°E  | 46.11°N  | 152.84      | 0.39 $\pm$ 0.01   | 0.44 $\pm$ 0.02   | 0.83 $\pm$ 0.03  | 7.91 $\pm$ 0.14 | 4.47 $\pm$ 0.11 | 2.40 $\pm$ 0.07  | 0.87 $\pm$ 0.12  | 23.11 $\pm$ 1.18 | 21.56 $\pm$ 2.00  |
| HRB1   | Harbin1      | 126.45°E  | 45.51°N  | 184.20      | 0.35 $\pm$ 0.04   | 0.42 $\pm$ 0.01   | 0.77 $\pm$ 0.03  | 6.48 $\pm$ 0.11 | 2.99 $\pm$ 0.15 | 1.49 $\pm$ 0.09  | 0.61 $\pm$ 0.06  | 19.08 $\pm$ 3.20 | 58.67 $\pm$ 6.42  |
| HRB2   | Harbin2      | 126.40°E  | 45.47°N  | 214.82      | 0.38 $\pm$ 0.04   | 0.46 $\pm$ 0.01   | 0.84 $\pm$ 0.05  | 6.66 $\pm$ 0.10 | 3.63 $\pm$ 0.13 | 1.74 $\pm$ 0.04  | 0.52 $\pm$ 0.04  | 17.24 $\pm$ 2.18 | 71.28 $\pm$ 3.84  |
| AC2    | Acheng2      | 126.97°E  | 45.43°N  | 164.91      | 0.34 $\pm$ 0.02   | 0.38 $\pm$ 0.01   | 0.72 $\pm$ 0.03  | 6.43 $\pm$ 0.09 | 2.90 $\pm$ 0.30 | 1.26 $\pm$ 0.23  | 0.59 $\pm$ 0.02  | 17.13 $\pm$ 2.48 | 39.65 $\pm$ 7.60  |
| FY2    | Fuyu2        | 126.18°E  | 45.13°N  | 184.10      | 0.37 $\pm$ 0.02   | 0.46 $\pm$ 0.02   | 0.83 $\pm$ 0.03  | 6.12 $\pm$ 0.13 | 2.46 $\pm$ 0.19 | 1.25 $\pm$ 0.05  | 0.54 $\pm$ 0.16  | 18.64 $\pm$ 5.57 | 51.67 $\pm$ 15.28 |
| FY1    | Fuyu1        | 126.08°E  | 44.95°N  | 197.80      | 0.41 $\pm$ 0.04   | 0.35 $\pm$ 0.02   | 0.76 $\pm$ 0.04  | 5.88 $\pm$ 0.09 | 2.71 $\pm$ 0.21 | 1.35 $\pm$ 0.17  | 0.60 $\pm$ 0.08  | 22.59 $\pm$ 6.76 | 65.00 $\pm$ 11.00 |
| WC1    | Wuchang1     | 127.03°E  | 44.90°N  | 209.00      | 0.35 $\pm$ 0.02   | 0.46 $\pm$ 0.02   | 0.81 $\pm$ 0.01  | 6.28 $\pm$ 0.29 | 3.94 $\pm$ 0.22 | 1.74 $\pm$ 0.05  | 1.16 $\pm$ 0.09  | 22.21 $\pm$ 3.15 | 60.92 $\pm$ 6.52  |

|      |              |          |         |        |           |           |           |           |           |           |           |            |             |
|------|--------------|----------|---------|--------|-----------|-----------|-----------|-----------|-----------|-----------|-----------|------------|-------------|
| YS2  | Yushu2       | 126.58°E | 44.86°N | 226.06 | 0.40±0.01 | 0.43±0    | 0.83±0.01 | 5.97±0.24 | 3.29±0.16 | 1.37±0.05 | 0.67±0.07 | 24.18±4.25 | 62.72±5.53  |
| DH1  | Dehui1       | 125.82°E | 44.58°N | 191.86 | 0.44±0.03 | 0.51±0.04 | 0.95±0.07 | 5.70±0.14 | 3.31±0.07 | 1.61±0.11 | 0.71±0.20 | 21.66±1.18 | 59.17±8.34  |
| NAN2 | Nongan2      | 125.24°E | 44.43°N | 195.09 | 0.37±0.02 | 0.33±0.02 | 0.70±0.04 | 8.08±0.12 | 2.70±0.21 | 1.48±0.12 | 0.81±0.09 | 16.45±1.75 | 14.24±2.17  |
| SLA2 | Shulan2      | 126.96°E | 44.38°N | 275.90 | 0.34±0.01 | 0.43±0.02 | 0.77±0.03 | 5.68±0.21 | 3.71±0.29 | 1.55±0.08 | 0.85±0.17 | 27.55±5.86 | 73.08±18.44 |
| JL2  | Jilin2       | 126.56°E | 44.06°N | 203.75 | 0.35±0.01 | 0.35±0.01 | 0.70±0.01 | 5.30±0.52 | 3.08±0.34 | 1.18±0.10 | 0.83±0.10 | 21.85±1.77 | 46.41±5.17  |
| CC2  | Changchun2   | 125.40°E | 44.00°N | 218.51 | 0.33±0.07 | 0.46±0.05 | 0.80±0.11 | 7.18±0.09 | 3.31±0.13 | 1.22±0.07 | 0.46±0.01 | 19.21±1.14 | 40.51±8.34  |
| CC1  | Changchun1   | 125.40°E | 44.00°N | 218.51 | 0.24±0.02 | 0.44±0.04 | 0.68±0.05 | 7.15±0.09 | 4.16±0.28 | 1.57±0.10 | 0.61±0.11 | 22.21±2.32 | 29.14±3.17  |
| YJ1  | Yongji1      | 126.42°E | 43.66°N | 271.86 | 0.33±0.02 | 0.29±0.01 | 0.62±0.02 | 5.43±0.04 | 2.29±0.15 | 0.99±0.01 | 0.72±0.01 | 29.80±5.87 | 32.11±1.90  |
| GZL1 | Gongzhuling1 | 124.83°E | 43.49°N | 255.83 | 0.33±0.01 | 0.40±0.01 | 0.73±0.02 | 6.36±0.41 | 2.29±0.29 | 0.83±0.12 | 0.36±0.08 | 18.81±2.04 | 34.32±7.38  |
| YT1  | Yitong1      | 125.27°E | 43.34°N | 287.36 | 0.33±0.05 | 0.40±0.01 | 0.73±0.06 | 5.58±0.11 | 2.88±0.29 | 1.14±0.17 | 0.65±0.13 | 27.75±3.18 | 50.55±11.03 |
| LS1  | Lishu1       | 124.40°E | 43.29°N | 208.71 | 0.40±0.03 | 0.29±0.01 | 0.69±0.04 | 5.76±0.15 | 2.57±0.13 | 1.17±0.04 | 0.62±0.08 | 26.65±2.35 | 74.53±11.96 |
| SP1  | Siping1      | 124.32°E | 43.10°N | 190.81 | 0.36±0.01 | 0.23±0.01 | 0.60±0.02 | 5.64±0.10 | 2.43±0.18 | 1.06±0.08 | 0.54±0.06 | 32.71±4.66 | 77.84±6.37  |
| DL1  | Dongliao1    | 125.05°E | 42.90°N | 279.65 | 0.35±0.02 | 0.41±0.01 | 0.76±0.01 | 5.14±0.19 | 2.75±0.26 | 1.23±0.09 | 0.87±0.12 | 24.43±5.56 | 55.68±22.09 |
| CT2  | Changtu2     | 124.13°E | 42.84°N | 172.27 | 0.35±0.05 | 0.47±0.02 | 0.82±0.07 | 6.71±0.07 | 3.37±0.48 | 1.28±0.21 | 0.47±0.05 | 16.39±0.88 | 32.00±3.39  |

---

EE-GRSP, easily extractable glomalin-related soil protein; DE-GRSP, difficultly extractable glomalin-related soil protein; T-GRSP, total glomalin-related soil protein; SOM, soil

organic matter; ACP, acid phosphatase.

**Table S2** Descriptive statistical parameters of different variables from 164 samples in black soil of northeast China.

| Variable       | Minimum | Maximum | Mean   | SD    | CV (%) |
|----------------|---------|---------|--------|-------|--------|
| Longitude (°E) | 124.13  | 127.49  | 126.00 | 0.82  | 0.654  |
| Latitude (°N)  | 42.84   | 49.18   | 45.93  | 1.89  | 4.121  |
| Altitude (m)   | 136.70  | 321.99  | 227.31 | 49.64 | 21.839 |
| EE-GRSP( mg/g) | 0.22    | 0.55    | 0.40   | 0.07  | 16.597 |
| DE-GRSP (mg/g) | 0.22    | 0.65    | 0.44   | 0.09  | 19.890 |
| T-GRSP (mg/g)  | 0.57    | 1.17    | 0.84   | 0.13  | 15.954 |
| pH             | 4.92    | 8.20    | 6.28   | 0.62  | 9.935  |
| SOM (%)        | 1.75    | 6.67    | 3.75   | 1.05  | 28.003 |
| Total N (g/kg) | 0.68    | 3.12    | 1.67   | 0.48  | 28.971 |
| Total P (g/kg) | 0.29    | 1.29    | 0.71   | 0.19  | 26.520 |
| Urease (mg/g)  | 6.96    | 39.43   | 19.97  | 5.80  | 29.058 |
| ACP (mg/g)     | 11.77   | 114.63  | 60.76  | 21.91 | 36.058 |

SD, standard deviation; CV, coefficient of variation; EE-GRSP, easily extractable glomalin-related soil protein; DE-GRSP, difficultly extractable glomalin-related soil protein; T-GRSP, total glomalin-related soil protein; SOM, soil organic matter; ACP, acid phosphatase.

**Table S3** Pearson's correlation coefficients among different edaphic variables. Pearson's correlation was calculated from 164 samples at 41 sampling sites.

| Variable | EE-GRSP  | DE-GRSP  | T-GRSP   | pH       | SOM     | Total N  | Total P | Urease |
|----------|----------|----------|----------|----------|---------|----------|---------|--------|
| DE-GRSP  | 0.513**  |          |          |          |         |          |         |        |
| T-GRSP   | 0.830**  | 0.904**  |          |          |         |          |         |        |
| pH       | -0.082   | 0.073    | 0.007    |          |         |          |         |        |
| SOM      | 0.569**  | 0.638**  | 0.697**  | 0.057    |         |          |         |        |
| Total N  | 0.600**  | 0.452**  | 0.591**  | 0.224**  | 0.856** |          |         |        |
| Total P  | 0.306**  | 0.237**  | 0.306**  | -0.176*  | 0.549** | 0.561**  |         |        |
| Urease   | -0.268** | -0.268** | -0.308** | -0.364** | -0.200* | -0.261** | -0.016  |        |
| ACP      | 0.468**  | 0.161*   | 0.337**  | -0.305** | 0.495** | 0.529**  | 0.221** | 0      |

EE-GRSP, easily extractable glomalin-related soil protein; DE-GRSP, difficultly extractable glomalin-related soil protein; T-GRSP, total glomalin-related soil protein; SOM, soil organic matter; ACP, acid phosphatase. \*  $P < 0.05$ ; \*\*  $P < 0.01$ .
